# Supplementary material for: Development and validation of the Collaborative Health Outcomes Information Registry body map
Source: PubMed Central journal article supplement — Pain Rep. 2021 Jan 15;6(1):e880. doi: 10.1097/PR9.0000000000000880 (PMC7813550; doi:10.1097/pr9.0000000000000880), 2021-01-15
Supplement: painreports-6-e880-s001.pdf [file painreports-6-e880-s001.pdf]

**Supplementary Digital Content 1. Participant-reported Pain Diagnoses within the “Other” category**

| <b>Diagnoses, <i>n</i> (%)</b>        | <b>Initial Survey<br/>(Study 1)<br/><i>n</i> = 530</b> | <b>Follow-up Survey<br/>(Study 2)<br/><i>n</i> = 278</b> | <b>In-person Interviews<br/>(Study 3)<br/><i>n</i> = 28</b> |
|---------------------------------------|--------------------------------------------------------|----------------------------------------------------------|-------------------------------------------------------------|
| Abdominal Pain                        | 6 (1.1%)                                               | 0 (0.0%)                                                 | 0 (0.0%)                                                    |
| Ankylosing Spondylitis                | 3 (0.6%)                                               | 1 (0.3%)                                                 | 0 (0.0%)                                                    |
| Arthritis                             | 8 (1.5%)                                               | 7 (2.5%)                                                 | 0 (0.0%)                                                    |
| Arthromyalgia                         | 0 (0.0%)                                               | 0 (0.0%)                                                 | 1 (3.6%)                                                    |
| Autoimmune Disease                    | 6 (1.1%)                                               | 3 (1.1%)                                                 | 0 (0.0%)                                                    |
| Avascular Necrosis                    | 1 (0.2%)                                               | 0 (0.0%)                                                 | 0 (0.0%)                                                    |
| Back Pain                             | 18 (3.4%)                                              | 4 (1.4%)                                                 | 3 (10.7%)                                                   |
| Bursitis                              | 2 (0.4%)                                               | 0 (0.0%)                                                 | 0 (0.0%)                                                    |
| Cancer Pain                           | 0 (0.0%)                                               | 0 (0.0%)                                                 | 1 (3.6%)                                                    |
| Central Pain Syndrome                 | 0 (0.0%)                                               | 0 (0.0%)                                                 | 1 (3.6%)                                                    |
| Cervical Stenosis                     | 1 (0.2%)                                               | 0 (0.0%)                                                 | 0 (0.0%)                                                    |
| Chronic Fatigue Syndrome              | 4 (0.8%)                                               | 2 (0.7%)                                                 | 0 (0.0%)                                                    |
| Crohn’s Disease                       | 1 (0.2%)                                               | 0 (0.0%)                                                 | 0 (0.0%)                                                    |
| Complex Regional Pain Syndrome (CRPS) | 0 (0.0%)                                               | 1 (0.3%)                                                 | 0 (0.0%)                                                    |
| Degenerative Disc Disease             | 6 (1.1%)                                               | 4 (1.4%)                                                 | 2 (7.2%)                                                    |
| Dystonia                              | 3 (0.6%)                                               | 2 (0.7%)                                                 | 0 (0.0%)                                                    |
| Ehlers Danlos Syndrome                | 12 (2.3%)                                              | 7 (2.5%)                                                 | 1 (3.6%)                                                    |
| Failed Back Surgery Syndrome          | 11 (2.1%)                                              | 4 (1.4%)                                                 | 1 (3.6%)                                                    |
| Fibromyalgia                          | 2 (0.4%)                                               | 0 (0.0%)                                                 | 0 (0.0%)                                                    |
| Headache                              | 8 (1.5%)                                               | 13 (4.6%)                                                | 0 (0.0%)                                                    |
| Herniated Disc                        | 3 (0.6%)                                               | 0 (0.0%)                                                 | 0 (0.0%)                                                    |
| Inflammatory Pain                     | 1 (0.2%)                                               | 4 (1.4%)                                                 | 0 (0.0%)                                                    |
| Injury, unspecified                   | 18 (3.4%)                                              | 5 (1.8%)                                                 | 1 (3.6%)                                                    |
| Interstitial Cystitis                 | 1 (0.2%)                                               | 0 (0.0%)                                                 | 0 (0.0%)                                                    |
| Kidney Pain                           | 2 (0.4%)                                               | 0 (0.0%)                                                 | 0 (0.0%)                                                    |
| Lyme Disease                          | 1 (0.2%)                                               | 0 (0.0%)                                                 | 0 (0.0%)                                                    |
| Lymphedema                            | 1 (0.2%)                                               | 0 (0.0%)                                                 | 0 (0.0%)                                                    |
| Marfan’s Causing Arthritis            | 1 (0.2%)                                               | 0 (0.0%)                                                 | 0 (0.0%)                                                    |
| Meralgia Paresthetica                 | 2 (0.4%)                                               | 1 (0.3%)                                                 | 0 (0.0%)                                                    |
| Migraine                              | 5 (0.9%)                                               | 0 (0.0%)                                                 | 0 (0.0%)                                                    |
| Musculoskeletal Pain                  | 24 (4.5%)                                              | 22 (7.9%)                                                | 0 (0.0%)                                                    |

|                                                  |           |           |          |
|--------------------------------------------------|-----------|-----------|----------|
| Myasthenia Gravis                                | 1 (0.2%)  | 1 (0.3%)  | 0 (0.0%) |
| Myofascial Pain                                  | 3 (0.6%)  | 1 (0.3%)  | 0 (0.0%) |
| Neck Pain                                        | 4 (0.8%)  | 2 (0.7%)  | 0 (0.0%) |
| Neuropathic Pain                                 | 20 (3.8%) | 8 (2.9%)  | 1 (3.6%) |
| Occipital Neuralgia                              | 3 (0.6%)  | 3 (1.1%)  | 0 (0.0%) |
| Osteoarthritis                                   | 2 (0.4%)  | 0 (0.0%)  | 0 (0.0%) |
| Osteoporosis                                     | 1 (0.2%)  | 0 (0.0%)  | 0 (0.0%) |
| Pelvic Pain /Vulvodynia                          | 5 (0.9%)  | 2 (0.7%)  | 0 (0.0%) |
| Phantom Limb Pain                                | 2 (0.4%)  | 0 (0.0%)  | 0 (0.0%) |
| Post-polio Syndrome                              | 1 (0.2%)  | 1 (0.3%)  | 0 (0.0%) |
| Postsurgical Pain                                | 13 (2.5%) | 10 (3.6%) | 1 (3.6%) |
| Postherpetic Neuralgia (Shingles)                | 2 (0.4%)  | 0 (0.0%)  | 0 (0.0%) |
| Postural Orthostatic Tachycardia Syndrome (POTS) | 1 (0.2%)  | 0 (0.0%)  | 0 (0.0%) |
| Psychosomatic                                    | 2 (0.4%)  | 0 (0.0%)  | 0 (0.0%) |
| Radiculopathy                                    | 9 (1.7%)  | 6 (2.1%)  | 0 (0.0%) |
| Sciatica                                         | 1 (0.2%)  | 0 (0.0%)  | 0 (0.0%) |
| Shoulder Pain                                    | 1 (0.2%)  | 0 (0.0%)  | 0 (0.0%) |
| SI Joint Dysfunction                             | 1 (0.2%)  | 0 (0.0%)  | 0 (0.0%) |
| Sjogren's Syndrome                               | 0 (0.0%)  | 1 (0.3%)  | 0 (0.0%) |
| Spinal Stenosis                                  | 0 (0.0%)  | 2 (0.7%)  | 0 (0.0%) |
| Tarlov Cyst                                      | 3 (0.6%)  | 1 (0.3%)  | 0 (0.0%) |
| Tethered Cord                                    | 1 (0.2%)  | 0 (0.0%)  | 0 (0.0%) |
| Thoracic Outlet Syndrome                         | 0 (0.0%)  | 1 (0.3%)  | 0 (0.0%) |
| Trigeminal Neuralgia                             | 1 (0.2%)  | 0 (0.0%)  | 0 (0.0%) |
| Tumor Pain                                       | 2 (0.4%)  | 0 (0.0%)  | 0 (0.0%) |
| Vascular Pain                                    | 3 (0.6%)  | 0 (0.0%)  | 0 (0.0%) |
| Vulvodynia                                       | 1 (0.2%)  | 0 (0.0%)  | 0 (0.0%) |

\*Percentages are based on the total cohort sample size
